# Supplementary material for: Occurrence, antimicrobial resistance and genomic features of Klebsiella pneumoniae from broiler chicken in Faisalabad, Pakistan
Source: Front Vet Sci. 2024 Aug 19;11:1433124. doi: 10.3389/fvets.2024.1433124 (PMC11366712; doi:10.3389/fvets.2024.1433124)
Supplement: Supplementary file 1 [file Table_1.XLSX]

## Sheet: Supplementary Table
Sr. Nr	id	displayname	latitude	longitude	day	month	year	literaturelink	Experiment accession	Collected by	Sample accession	Country	Host sex	Study accession	Sample alias	Isolation source	Accession	Alternative sample name 1	Run accession	City/region	Collection date	Host status	Host		Environmental sample	literatureLink	Age group	Secondary sample accession	Alternative sample name 2
1	624c15d498030c4ecf4469f1	ERR025099	-25	135	1	1	2002		ERX2005784		SAMEA882169	Australia		PRJEB2111	AJ281-sc-2010-05-07-30788	sterile			ERR025099		2002-01-01	diseased	Human		FALSE			ERS005786
2	5f488198f87f395ddc91ce3e	ERR1205010	53.45	14.5	6	2	2014		ERX1277252		SAMEA3499928	Poland		PRJEB10018		Blood		EuSCAPE_PL001	ERR1205010		2014-01-01	Infection	Human		FALSE			ERS807077
3	5f49107d64435f1192746366	ERR1205019	52.1952	18.2393	18	3	2014		ERX1277261		SAMEA3499980	Poland		PRJEB10018		Urine		EuSCAPE_PL020	ERR1205019		2014-01-01	Infection	Human		FALSE			ERS807129
4	5f487409677a55f0232467d1	ERR1205022	54.18	15.57	19	12	2013		ERX1277264		SAMEA3499987	Poland		PRJEB10018		Blood		EuSCAPE_PL024	ERR1205022		2013-01-01	Infection	Human		FALSE			ERS807136
5	5f49a3b264435f4567747954	ERR1205030	52.4032	16.9354	23	1	2014		ERX1277272		SAMEA3499949	Poland		PRJEB10018		Wound secretion		EuSCAPE_PL051	ERR1205030		2014-01-01	Infection	Human		FALSE			ERS807098
6	5f47e04164435f6aaf744b5c	ERR1334731	40.2036	-8.41852	26	3	2014		ERX1406323		SAMEA3649906	Portugal		PRJEB10018		Other (sputum)		EuSCAPE_PT092	ERR1334731		2014-01-01	Colonization	Human		FALSE			ERS957055
7	5f492eb2677a55073124763c	ERR1514882	50.8881	4.30743	21	11	2013		ERX1585902		SAMEA3727648	Belgium		PRJEB10018		Lower respiratory tract secrection		EuSCAPE_BE059	ERR1514882		2013-01-01		Human		FALSE			ERS1034797
8	5f49b2e4677a552a08248128	ERR1541546	52.4032	16.9354	13	11	2013		ERX1612311		SAMEA3729907	Poland		PRJEB10018		Blood		EuSCAPE_PL047	ERR1541546		2013-01-01	Infection	Human		FALSE			ERS1037056
9	5f48d38864435feeab745e88	ERR1541547	52.4032	16.9354	23	1	2014		ERX1612312		SAMEA3729908	Poland		PRJEB10018		Lower respiratory tract secrection		EuSCAPE_PL053	ERR1541547		2014-01-01	Infection	Human		FALSE			ERS1037057
10	5f3a6c592ff7d2280685cb60	ERR1852893	7.09837	125.62	3	9	2013		ERX1914871		SAMEA4532009	Philippines		PRJEB17615		Urine		21523_2#120	ERR1852893	Davao City; XI/Davao del Sur			Human		FALSE	32483195		ERS1431188	13ARS_DMC0155
11	5f3a6c592ff7d2112785cc03	ERR1853056	14.5823	120.975	7	2	2014		ERX1915034		SAMEA4532172	Philippines		PRJEB17615		Sputum		21523_3#97	ERR1853056	Quezon City; NCR/Metro Manila			Human		FALSE	32483195		ERS1431351	14ARS_NKI0016
12	5f4886bbf87f39f73d91ceb8	ERR2586414	14.0167	107.9	10	7	2010		ERX2603142		SAMEA4668459	Vietnam		PRJEB26814		Blood		353	ERR2586414		2010-07-10		Human		FALSE			ERS2489074
13	5f48d80b677a55cc7d246efe	ERR2586425	14.0167	107.9	15	7	2012		ERX2603153		SAMEA4668470	Vietnam		PRJEB26814		Blood		364	ERR2586425		2012-07-15		Human		FALSE			ERS2489085
14	624c15d498030c859d446cbe	ERR2854261	19.8563	102.496			2015	31948471	ERX2860850		SAMEA104208382	Laos		PRJEB21605		blood			ERR2854261		2015		Human		FALSE			ERS1867400
15	5f47c501f87f39050e91c04d	ERR3162606	21	77			2017		ERX3190690		SAMEA5232569	India		PRJEB30913		Blood		BA38736	ERR3162606		2017-01-01	diseased	Human		FALSE			ERS3039996
16	5f48cf2af87f39656d91dd13	ERR3416280	14.3667	-14.2833			2016		ERX3439808		SAMEA5753724	Senegal		PRJEB29143		Faecal		SB5770	ERR3416280				Human		FALSE			ERS3557181
17	5f48fff4f87f39ef2b91e0f7	ERR3416392	14.3667	-14.2833			2016		ERX3439920		SAMEA5753792	Senegal		PRJEB29143		Faecal		SB6073	ERR3416392				Human		FALSE			ERS3557249
18	5f48ea43f87f3940ae91df77	ERR349846	26.5333	86.7333			2012		ERX322682		SAMEA2073511	Nepal		PRJEB1800		Urine		570-sc-2013-05-22T14:18:35Z-1635072	ERR349846		2012-01-01	Diseased	Human		FALSE			ERS249109
19	624c286d37ff7c70a124994e	ERR3575027	52.6274	-1.1365	10	11	2006		ERX3573265		SAMEA5983667	United Kingdom		PRJEB34549	23	Urine			ERR3575027		2006-11-10	diseased	Human		FALSE			ERS3786492
20	624c286d37ff7c356a249956	ERR3575035	52.6274	-1.1365	15	1	2007		ERX3573273		SAMEA5983675	United Kingdom		PRJEB34549	31	Urine			ERR3575035		2007-01-15	diseased	Human		FALSE			ERS3786500
21	5f4946a1f87f393f0a91e782	ERR3712736	52.3167	5.55					ERX3716183		SAMEA6368343	Netherlands		PRJEB35685				RIVM_C013190	ERR3712736						FALSE			ERS4134446
22	5f493c0a64435f4895747044	ERR3712822	52.3167	5.55					ERX3716269		SAMEA6368429	Netherlands		PRJEB35685				RIVM_C014823	ERR3712822						FALSE			ERS4134532
23	624c4ad037ff7c5ddb24b1be	ERR4463563	51	10					ERX4403934		SAMEA7190592	Germany		PRJEB39867	RBK-17-495-1				ERR4463563				Human		FALSE			ERS4950825
24	624c4ad037ff7c1d6b24b209	ERR4465185	51	10					ERX4404043		SAMEA7190667	Germany		PRJEB39867	RPG-17-024-1				ERR4465185				Human		FALSE			ERS4950900
25	5f2d9213f7578a6a31a38961	ERR4795383	6.64371	-73.6536			2017		ERX4665153		SAMEA5855718	Colombia		PRJEB29742		Urine		G18001124	ERR4795383	Santander			Human		FALSE			ERS3644238	GMR-RA 563.17
26	5f2d9213f7578a6fe2a38962	ERR4795384	6.64371	-73.6536			2017		ERX4665154		SAMEA5855719	Colombia		PRJEB29742		Bronquial secretion		G18001127	ERR4795384	Santander			Human		FALSE			ERS3644239	GMR-RA 566.17
27	5f2d9213f7578a95c8a3897e	ERR4795386	6.64371	-73.6536			2017		ERX4665156		SAMEA5855728	Colombia		PRJEB29742		Abdominal fluid		G18001167	ERR4795386	Santander			Human		FALSE			ERS3644248	GMR-RA 732.17
28	5f2d9213f7578a3fe0a3894f	ERR4795415	6.64371	-73.6536			2017		ERX4665185		SAMEA5855706	Colombia		PRJEB29742		Abdomen		G18001095	ERR4795415	Santander			Human		FALSE			ERS3644226	GMR-RA 441.17
29	5f2d9213f7578a226aa38954	ERR4795416	6.64371	-73.6536			2017		ERX4665186		SAMEA5855707	Colombia		PRJEB29742		Secretion		G18001100	ERR4795416	Santander			Human		FALSE			ERS3644227	GMR-RA 476.17
30	5f2d9213f7578ad89aa38960	ERR4795421	6.64371	-73.6536			2017		ERX4665191		SAMEA5855717	Colombia		PRJEB29742		Bronquial secretion		G18001123	ERR4795421	Santander			Human		FALSE			ERS3644237	GMR-RA 562.17
31	5f2d9213f7578a1b75a38963	ERR4795422	6.64371	-73.6536			2017		ERX4665192		SAMEA5855720	Colombia		PRJEB29742		Urine		G18001129	ERR4795422	Santander			Human		FALSE			ERS3644240	GMR-RA 569.17
32	5f2d9213f7578a0368a38964	ERR4795423	6.64371	-73.6536			2017		ERX4665193		SAMEA5855722	Colombia		PRJEB29742		Urine		G18001131	ERR4795423	Santander			Human		FALSE			ERS3644242	GMR-RA 577.17
33	5f2d9213f7578a5998a38976	ERR4795424	4.71099	-74.0721			2017		ERX4665194		SAMEA5855724	Colombia		PRJEB29742		Spinal fluid		G18001156	ERR4795424	BogotÃ¡			Human		FALSE			ERS3644244	GMR-RA 702.17
34	5f2d9213f7578adbdba38979	ERR4795426	6.64371	-73.6536			2017		ERX4665196		SAMEA5855726	Colombia		PRJEB29742		Urine		G18001161	ERR4795426	Santander			Human		FALSE			ERS3644246	GMR-RA 720.17
35	5f2d9213f7578ae54da3897a	ERR4795427	4.71099	-74.0721			2017		ERX4665197		SAMEA5855727	Colombia		PRJEB29742		Urine		G18001162	ERR4795427	BogotÃ¡			Human		FALSE			ERS3644247	GMR-RA 724.17
36	5f2d9213f7578a4cb8a3894e	ERR4795491	6.64371	-73.6536			2017		ERX4665261		SAMEA5855705	Colombia		PRJEB29742		Abdomen		G18001094	ERR4795491	Santander			Human		FALSE			ERS3644225	GMR-RA 430.17
37	5f2d9213f7578a48c2a38955	ERR4795493	6.64371	-73.6536			2017		ERX4665263		SAMEA5855708	Colombia		PRJEB29742		Urine		G18001102	ERR4795493	Santander			Human		FALSE			ERS3644228	GMR-RA 479.17
38	5f2d9213f7578a1a65a38957	ERR4795494	4.71099	-74.0721			2017		ERX4665264		SAMEA5855710	Colombia		PRJEB29742				G18001104	ERR4795494	BogotÃ¡			Human		FALSE			ERS3644230	GMR-RA 485.17
39	5f2d9213f7578a5bbea3896e	ERR4795578	6.64371	-73.6536			2017		ERX4665348		SAMEA6375629	Colombia		PRJEB29742		Pelvic drainage		G18001144	ERR4795578	Santander			Human		FALSE			ERS4141722	GMR-RA 634.17
40	5f2d9213f7578aa161a38971	ERR4795580	6.64371	-73.6536			2017		ERX4665350		SAMEA6375630	Colombia		PRJEB29742		Urine		G18001150	ERR4795580	Santander			Human		FALSE			ERS4141723	GMR-RA 655.17
41	5f2d9213f7578a25fda38972	ERR4795581	6.64371	-73.6536			2017		ERX4665351		SAMEA6375633	Colombia		PRJEB29742		Blood		G18001151	ERR4795581	Santander			Human		FALSE			ERS4141726	GMR-RA 656.17
42	5f2d9213f7578aa689a3897c	ERR4795584	6.64371	-73.6536			2017		ERX4665354		SAMEA6375635	Colombia		PRJEB29742		Urine		G18001165	ERR4795584	Santander			Human		FALSE			ERS4141728	GMR-RA 729.17
43	5f2d9213f7578a33c7a3891f	ERR4795623	6.64371	-73.6536			2016		ERX4665393		SAMEA6375589	Colombia		PRJEB29742		Urine		G18001009	ERR4795623	Santander			Human		FALSE			ERS4141682	GMR-RA 705.16
44	5f2d9213f7578a23c2a38977	ERR4795635	6.64371	-73.6536			2017		ERX4665405		SAMEA6375632	Colombia		PRJEB29742				G18001157	ERR4795635	Santander			Human		FALSE			ERS4141725	GMR-RA 703.17
45	5f2d9213f7578ab096a3887c	ERR4795653	8.67044	-74.03			2015		ERX4665423		SAMEA6375500	Colombia		PRJEB29742		Urine		G18000686	ERR4795653	Bolivar			Human		FALSE			ERS4141593	GMR - RA 149
46	5f2d9213f7578ad0dda3891d	ERR4795776	10.6966	-74.8741			2016		ERX4665546		SAMEA6375591	Colombia		PRJEB29742		Urine		G18001007	ERR4795776	AtlÃ¡ntico			Human		FALSE			ERS4141684	GMR-RA 697.16
47	5f2d9213f7578a9210a3894b	ERR4795819	6.64371	-73.6536			2017		ERX4665589		SAMEA6375614	Colombia		PRJEB29742		Urine		G18001086	ERR4795819	Santander			Human		FALSE			ERS4141707	GMR-RA 403.17
48	5f2d9213f7578aa80da38924	ERR4795857	5.29826	-75.2479			2017		ERX4665627		SAMEA6425147	Colombia		PRJEB29742		Rectal swab		G18001016	ERR4795857	Caldas			Human		FALSE			ERS4191358	GMR-RA 26.17
49	5f2d9213f7578a29cea38953	ERR4795862	6.64371	-73.6536			2017		ERX4665632		SAMEA6425182	Colombia		PRJEB29742		Blood		G18001099	ERR4795862	Santander			Human		FALSE			ERS4191393	GMR-RA 475.17
50	5f2d9213f7578a2640a38975	ERR4795867	6.64371	-73.6536			2017		ERX4665637		SAMEA6425183	Colombia		PRJEB29742				G18001154	ERR4795867	Santander			Human		FALSE			ERS4191394	GMR-RA 662.17
51	5f47c4fe64435fad647446c1	ERR486284	54	-2			2001		ERX452116		SAMEA2273527	United Kingdom		PRJEB5065		Blood		MDR0942-sc-1792142	ERR486284		2001-01-01	diseased	Human		FALSE			ERS380922
52	624c54ab98030c3b23448642	ERR5056433	61	8	1	1	2015		ERX4862502		SAMEA7773729	Norway		PRJEB42350	T7-180	Faeces			ERR5056433		2015-01-01	restricted access	Human		FALSE			ERS5520971
53	62ac96c6289af200293aceaf	ERR5319374	40	-3	1	1	2018		ERX5108777		SAMEA8065711	Spain		PRJEB42440	AI2851	Hospital Universitario Mutua de Terrassa (Terrassa)			ERR5319374		2018-01-01	diseased	Human		FALSE			ERS5752882
54	62ac96c6289af200293aceb3	ERR5319384	40	-3	1	1	2018		ERX5108787		SAMEA8065714	Spain		PRJEB42440	AI2854	Hospital Universitario Mutua de Terrassa (Terrassa)			ERR5319384		2018-01-01	diseased	Human		FALSE			ERS5752885
55	624c646c98030cf814448f22	ERR5752192	33	73	1	1	2016		ERX5462811	researchers and medical staff	SAMEA8581332	Pakistan		PRJEB40861	IS1015				ERR5752192		2016-01-01	diseased	human		TRUE			ERS6265988
56	624c68f437ff7c5cdc24bd0c	ERR6294218	61	8			2009	34935048	ERX5926689		SAMEA8948605	Norway		PRJEB27256	KP_NORM_BLD_63842	blood			ERR6294218		2009	diseased	Human		FALSE			ERS6631377
57	62ac96db289af200293ad3a9	ERR7672082	46.7986	8.23197	1	1	2018		ERX7241065		SAMEA11577420	Switzerland		PRJEB49326	719765-18	Urine Sample			ERR7672082		2018-01-01		Human		FALSE			ERS9223533
58	62ac96dd289af200293ad3e5	ERR7672112	46.7986	8.23197	1	1	2018		ERX7241095		SAMEA11577450	Switzerland		PRJEB49326	803471-18	Urine Sample			ERR7672112		2018-01-01		Human		FALSE			ERS9223563
59	62ac96e2289af200293ad53f	ERR8024960	8	-1	1	1	2021		ERX7590554		SAMEA12311723	Ghana		PRJEB46496	PW0012.2	hospital surface			ERR8024960		2021-01-01		hosptial surface		FALSE			ERS9918568
60	65c4cab5b20de024b906f6c0	SAMEA10302332							ERX10218419		SAMEA10302332			PRJEB37378	d65552b8-2812-11ec-ba34-fa163eea3084		ERR10767525		ERR10767525									ERS7957041
61	65c5e53310bc37c3fd4b6df5	SAMEA10302373							ERX10218367		SAMEA10302373			PRJEB37378	d707c074-2812-11ec-ba34-fa163eea3084		ERR10767473		ERR10767473									ERS7957081
62	65c4cab5b20de00a1506f645	SAMEA10302561							ERX10216391		SAMEA10302561			PRJEB37378	d98692da-2812-11ec-ba34-fa163eea3084		ERR10765497		ERR10765497									ERS7957268
63	65c4cab5b20de0732306f60a	SAMEA10302636							ERX10216155		SAMEA10302636			PRJEB37378	d8df31a2-2812-11ec-ba34-fa163eea3084		ERR10765261		ERR10765261									ERS7957343
64	65c5e53310bc37d4204b6d47	SAMEA10302692							ERX10216185		SAMEA10302692			PRJEB37378	da3fc7c8-2812-11ec-ba34-fa163eea3084		ERR10765291		ERR10765291									ERS7957399
65	6582e073ebb2f79b3dbbd6fc	SAMEA10302882							ERX10152984		SAMEA10302882			PRJEB37378	db1be2b2-2812-11ec-ba34-fa163eea3084		ERR10686276		ERR10686276									ERS7957589
66	65c5e53310bc37fe104b6dbe	SAMEA10303338							ERX10216775		SAMEA10303338			PRJEB37378	dffaba88-2812-11ec-ba34-fa163eea3084		ERR10765881		ERR10765881									ERS7958045
67	657064147ece94a233309084	SAMEA110371446	39.6622	-8.13535			2010		ERX9571545		SAMEA110371446	Portugal		PRJEB38289	2954	Lisbon	ERR10030881		ERR10030881		2010	diseased						ERS12469643
68	657064147ece94636d30921b	SAMEA111504313	-0.180653	-78.4678	3	8	2020		ERX9963155	Eugenio Espejo Hospital	SAMEA111504313	Ecuador		PRJEB56918	DTU_2021_1002320_1_SI_ECU_QUI_EEH_003	aspirate	ERR10437152		ERR10437152		2020-08-03	diseased						ERS13616675
69	657064147ece948154309221	SAMEA111504320	-0.180653	-78.4678	9	8	2020		ERX9963181	Eugenio Espejo Hospital	SAMEA111504320	Ecuador		PRJEB56918	DTU_2021_1002319_1_SI_ECU_QUI_EEH_002	aspirate	ERR10437181		ERR10437181		2020-08-09	diseased						ERS13616682
70	657064147ece942b74309229	SAMEA111504327	-0.180653	-78.4678	13	8	2020		ERX9963214	Eugenio Espejo Hospital	SAMEA111504327	Ecuador		PRJEB56918	DTU_2021_1002327_1_SI_ECU_QUI_EEH_010	blood	ERR10437235		ERR10437235		2020-08-13	diseased						ERS13616689
71	657064147ece9464c530922f	SAMEA111504340	-0.180653	-78.4678	16	8	2020		ERX9963234	Eugenio Espejo Hospital	SAMEA111504340	Ecuador		PRJEB56918	DTU_2021_1002334_1_SI_ECU_QUI_EEH_017	blood	ERR10437266		ERR10437266		2020-08-16	diseased						ERS13616702
72	657064147ece944a9a30923c	SAMEA111504358	-0.180653	-78.4678	24	8	2020		ERX9963302	Eugenio Espejo Hospital	SAMEA111504358	Ecuador		PRJEB56918	DTU_2021_1002340_1_SI_ECU_QUI_EEH_023	aspirate	ERR10437352		ERR10437352		2020-08-24	diseased						ERS13616720
73	657064147ece94477530923d	SAMEA111504359	-0.180653	-78.4678	25	8	2020		ERX9963307	Eugenio Espejo Hospital	SAMEA111504359	Ecuador		PRJEB56918	DTU_2021_1002339_1_SI_ECU_QUI_EEH_022	aspirate	ERR10437357		ERR10437357		2020-08-25	diseased						ERS13616721
74	658026685b0defbddf899058	SAMEA112282170	22.3511	78.6677					ERX10188060	Breach Candy Hospitals	SAMEA112282170	India		PRJEB50614	G20252230	BLOOD	ERR10738734		ERR10738734									ERS14393021
75	658026685b0def7a8c899077	SAMEA112282220	22.3511	78.6677					ERX10188110	Neugen Laboratories	SAMEA112282220	India		PRJEB50614	G20252499	URINE	ERR10738784		ERR10738784									ERS14393071
76	658026685b0defbdef8990b1	SAMEA112282311	22.3511	78.6677					ERX10188201	SCTIMST	SAMEA112282311	India		PRJEB50614	G20252761	URINE	ERR10738875		ERR10738875									ERS14393162
77	65c6021910bc3734da4b7a16	SAMEA113605428	61.1529	8.78767			2018		ERX10981856		SAMEA113605428	Norway		PRJEB48268	NK_H12_076	blood	ERR11578196		ERR11578196		2018	diseased						ERS15599805
78	65c6021910bc3732554b7a9c	SAMEA113605629	61.1529	8.78767			2017		ERX10982046		SAMEA113605629	Norway		PRJEB48268	NK_H16_012	blood	ERR11578386		ERR11578386		2017	diseased						ERS15600006
79	65c6021910bc37fa5f4b7aa3	SAMEA113605648	61.1529	8.78767			2018		ERX10982065		SAMEA113605648	Norway		PRJEB48268	NK_H17_008	blood	ERR11578405		ERR11578405		2018	diseased						ERS15600025
80	65c495f75f13bb6eecf40efc	SAMEA113934950	44.42	26.1			2018		ERX10995122		SAMEA113934950	Romania		PRJEB63349	RO37020_UR_KP	clinical material	ERR11592520		ERR11592520		2018							ERS15929111
81	65c34c3944ae8567282baa40	SAMEA113935193	41.38	-2.16			2016		ERX10995365		SAMEA113935193	Spain		PRJEB63349	SP03001_BL_KP	clinical material	ERR11592763		ERR11592763		2016							ERS15929354
82	65c5e53310bc37f2514b6f41	SAMEA114110921	-33.97	18.57			2019		ERX11147828		SAMEA114110921	South Africa		PRJEB63361	CRESA-14810	clinical material	ERR11748496		ERR11748496		2019	Clinical						ERS16091646
83	65c34c3944ae85e62c2baad4	SAMEA114111100	-33.97	18.57			2019		ERX11148007		SAMEA114111100	South Africa		PRJEB63361	CRESA-KP265	clinical material	ERR11748675		ERR11748675		2019	Clinical						ERS16091825
84	65c5e53310bc37a92e4b6f82	SAMEA114111106	-33.97	18.57			2019		ERX11148013		SAMEA114111106	South Africa		PRJEB63361	CRESA-KP273	clinical material	ERR11748681		ERR11748681		2019	Screen						ERS16091831
85	65c5e53310bc3708d84b6f83	SAMEA114111107	-33.97	18.57			2019		ERX11148014		SAMEA114111107	South Africa		PRJEB63361	CRESA-KP274A	clinical material	ERR11748682		ERR11748682		2019	Screen						ERS16091832
86	65c5e53310bc3720484b7006	SAMEA114236683	63.2468	25.9209		2	2022		ERX11403568	University of Helsinki	SAMEA114236683	Finland		PRJEB64775	K44		ERR12019289		ERR12019289		2022-02							ERS16222122
87	658026675b0def5488898a20	SAMEA12940399	39.3261	-4.83798	11	3	2019		ERX8236752		SAMEA12940399	Spain		PRJEB50822	A0608	Human	ERR8604172		ERR8604172		2019-03-11	diseased						ERS10539196
88	658026675b0def8b1c898a79	SAMEA12940538	39.3261	-4.83798	22	2	2019		ERX8236891		SAMEA12940538	Spain		PRJEB50822	B0402	Human	ERR8604311		ERR8604311		2019-02-22	diseased						ERS10539335
89	658026675b0defd314898af3	SAMEA12940723	39.3261	-4.83798	27	4	2019		ERX8237076		SAMEA12940723	Spain		PRJEB50822	K0009	Human	ERR8604496		ERR8604496		2019-04-27	diseased						ERS10539520
90	65c6021a10bc376ed94b7d55	SAMN25041584	16.2368	-61.5254			2018		SRX13812365	Institut Pasteur in Guadeloupe (French West Indies)	SAMN25041584	Guadeloupe		PRJNA778230	GwaKP021	human	SRR17644162		SRR17644162		2018		Human					SRS11692972
91	65c6021a10bc37d03b4b7d66	SAMN25041690	16.2368	-61.5254			2019		SRX13812625	Institut Pasteur in Guadeloupe (French West Indies)	SAMN25041690	Guadeloupe		PRJNA778230	GwaKP197	human	SRR17644233		SRR17644233		2019		Human					SRS11693235
92	65c6021a10bc3714634b7d60	SAMN25041704	16.2368	-61.5254			2019		SRX13812640	Institut Pasteur in Guadeloupe (French West Indies)	SAMN25041704	Guadeloupe		PRJNA778230	GwaKP230	human	SRR17644218		SRR17644218		2019		Human					SRS11693248
93	65c6021a10bc374a774b7d91	SAMN25041717	16.2368	-61.5254			2019		SRX13812468	Institut Pasteur in Guadeloupe (French West Indies)	SAMN25041717	Guadeloupe		PRJNA778230	GwaKP255	human	SRR17644390		SRR17644390		2019		Human					SRS11693076
94	65c4cab6b20de08fcc06f93d	SAMN25041721	16.2368	-61.5254			2019		SRX13812472	Institut Pasteur in Guadeloupe (French West Indies)	SAMN25041721	Guadeloupe		PRJNA778230	GwaKP260	human	SRR17644386		SRR17644386		2019		Human					SRS11693080
95	65c4cab6b20de04acd06f911	SAMN25041758	16.2368	-61.5254			2019		SRX13812369	Institut Pasteur in Guadeloupe (French West Indies)	SAMN25041758	Guadeloupe		PRJNA778230	GwaKP359	human	SRR17644158		SRR17644158		2019		Human					SRS11692976
96	65c6021a10bc373fb14b7d6e	SAMN25041853	16.2368	-61.5254			2019		SRX13812589	Institut Pasteur in Guadeloupe (French West Indies)	SAMN25041853	Guadeloupe		PRJNA778230	GwaKP570	human	SRR17644269		SRR17644269		2019		Human					SRS11693198
97	65c4cab6b20de0bf3b06f925	SAMN25041854	16.2368	-61.5254			2019		SRX13812590	Institut Pasteur in Guadeloupe (French West Indies)	SAMN25041854	Guadeloupe		PRJNA778230	GwaKP571	human	SRR17644268		SRR17644268		2019		Human					SRS11693197
98	65c6021a10bc3748b74b7f0e	SAMN26976457	42.28	-83.74	11	9	2018		SRX15159889	Michael A. Bachman	SAMN26976457	USA		PRJNA789565	923-JV-238	rectal swab	SRR19090217		SRR19090217	Ann Arbor, Michigan	2018-09-11		Human					SRS12902282
99	65c4cab6b20de058e006fa24	SAMN26976464	42.28	-83.74	16	9	2018		SRX15159898	Michael A. Bachman	SAMN26976464	USA		PRJNA789565	923-JV-245	clinical sample	SRR19090208		SRR19090208	Ann Arbor, Michigan	2018-09-16		Human					SRS12902291
100	65c6021a10bc3759b54b7e71	SAMN27533715	39.7837	-100.446					SRX14830101		SAMN27533715	USA		PRJNA825705	CRE276KLPN	blood	SRR18729628		SRR18729628				Human					SRS12585919
101	65c495f75f13bbd943f4119a	SAMN28669093	-22.1647	144.584	17	4	2018		SRX15613971	missing	SAMN28669093	Australia		PRJNA797179	M84017_2	Rectal swab	SRR19561831		SRR19561831	Queensland	2018-04-17		Human					SRS13314706
102	65c6021a10bc370e5e4b80c0	SAMN29188215	23.685	90.356	25	4	2016		SRX15789841	Child Health Research Foundation (CHRF)	SAMN29188215	Bangladesh		PRJNA845975	CHRF_KPN_0217	missing	SRR19743769		SRR19743769		2016-04-25		Human					SRS13482648
103	65c6021a10bc37dfa74b8102	SAMN29188224	23.685	90.356	14	8	2018		SRX15789673	Child Health Research Foundation (CHRF)	SAMN29188224	Bangladesh		PRJNA845975	CHRF_KPN_0226	missing	SRR19743937		SRR19743937		2018-08-14		Human					SRS13482480
104	65c34c3944ae856df32bac64	SAMN29188263	23.685	90.356	30	8	2019		SRX15789752	Child Health Research Foundation (CHRF)	SAMN29188263	Bangladesh		PRJNA845975	CHRF_KPN_0277	missing	SRR19743858		SRR19743858		2019-08-30		Human					SRS13482559
105	65c4cab6b20de0bda206fc2a	SAMN29203684	-25.7479	28.2293	28	1	2020		SRX17887415	Tembisa Hospital Clinician	SAMN29203684	South Africa	male	PRJNA850834	JSK_2019-7	Pus swab	SRR21901337		SRR21901337	Pretoria	2020-01-28		Human					SRS15404651
106	65c4cab6b20de0499d06fc2d	SAMN29203690	-25.7479	28.2293	20	1	2020		SRX17887389	Tembisa Hospital Clinician	SAMN29203690	South Africa	male	PRJNA850834	JSK_2019-13	Blood culture	SRR21901363		SRR21901363	Pretoria	2020-01-20		Human					SRS15404625
107	65c4cab6b20de07f8206fc2c	SAMN29203692	-25.7479	28.2293	15	1	2020		SRX17887391	Tembisa Hospital Clinician	SAMN29203692	South Africa	female	PRJNA850834	JSK_2019-15	Rectal swab	SRR21901361		SRR21901361	Pretoria	2020-01-15		Human					SRS15404627
108	65c6021a10bc373d934b8190	SAMN29203693	-25.7479	28.2293	1	10	2020		SRX17887392	Tembisa Hospital Clinician	SAMN29203693	South Africa	male	PRJNA850834	JSK_2019-16	Blood culture	SRR21901360		SRR21901360	Pretoria	2020-10-01		Human					SRS15404628
109	65c6021a10bc37825d4b818f	SAMN29203694	-25.7479	28.2293	1	8	2020		SRX17887393	Tembisa Hospital Clinician	SAMN29203694	South Africa	female	PRJNA850834	JSK_2019-17	Rectal swab	SRR21901359		SRR21901359	Pretoria	2020-08-01		Human					SRS15404629
110	65c34c3944ae85d35b2bacf3	SAMN29203699	-25.7479	28.2293	1	3	2020		SRX17887399	Tembisa Hospital Clinician	SAMN29203699	South Africa	female	PRJNA850834	JSK_2019-22	Blood culture	SRR21901353		SRR21901353	Pretoria	2020-03-01		Human					SRS15404635
111	65c6021a10bc376bf64b818e	SAMN29203701	-25.7479	28.2293	23	12	2019		SRX17887400	Tembisa Hospital Clinician	SAMN29203701	South Africa	female	PRJNA850834	JSK_2019-24	Rectal swab	SRR21901352		SRR21901352	Pretoria	2019-12-23		Human					SRS15404636
112	65c495f85f13bb04dcf412f7	SAMN29203702	-25.7479	28.2293	27	12	2019		SRX17887401	Tembisa Hospital Clinician	SAMN29203702	South Africa	female	PRJNA850834	JSK_2019-25	Blood culture	SRR21901351		SRR21901351	Pretoria	2019-12-27		Human					SRS15404637
113	65c495f85f13bb10bff412f6	SAMN29203703	-25.7479	28.2293	23	12	2019		SRX17887402	Tembisa Hospital Clinician	SAMN29203703	South Africa	female	PRJNA850834	JSK_2019-26	Blood culture	SRR21901350		SRR21901350	Pretoria	2019-12-23		Human					SRS15404638
114	65c495f85f13bb3910f412f5	SAMN29203704	-25.7479	28.2293	19	12	2019		SRX17887403	Tembisa Hospital Clinician	SAMN29203704	South Africa	female	PRJNA850834	JSK_2019-27	Endotracheal aspirate	SRR21901349		SRR21901349	Pretoria	2019-12-19		Human					SRS15404639
115	65c495f85f13bb8437f412f4	SAMN29203705	-25.7479	28.2293	23	12	2019		SRX17887404	Tembisa Hospital Clinician	SAMN29203705	South Africa	male	PRJNA850834	JSK_2019-28	Blood culture	SRR21901348		SRR21901348	Pretoria	2019-12-23		Human					SRS15404640
116	65c6021a10bc3767da4b818d	SAMN29203706	-25.7479	28.2293	20	12	2019		SRX17887405	Tembisa Hospital Clinician	SAMN29203706	South Africa	female	PRJNA850834	JSK_2019-29	Blood culture	SRR21901347		SRR21901347	Pretoria	2019-12-20		Human					SRS15404641
117	65c5e53410bc37e65c4b725c	SAMN29203707	-25.7479	28.2293	19	12	2019		SRX17887406	Tembisa Hospital Clinician	SAMN29203707	South Africa	female	PRJNA850834	JSK_2019-30	Blood culture	SRR21901346		SRR21901346	Pretoria	2019-12-19		Human					SRS15404642
118	65c34c3944ae8500392bac7d	SAMN29478249	23.68	90.35	4	9	2019		SRX15994649	Child Health Research Foundation	SAMN29478249	Bangladesh		PRJNA845975	CHRF_KPN_0281	missing	SRR19952201		SRR19952201		2019-09-04		Human					SRS13680910
119	65c5e53410bc37d1184b7220	SAMN29478261	23.68	90.35	20	7	2006		SRX15994663	Child Health Research Foundation	SAMN29478261	Bangladesh		PRJNA845975	CHRF_KPN_0458	missing	SRR19952187		SRR19952187		2006-07-20		Human					SRS13680924
120	6582e074ebb2f74671bbdb4b	SAMN31927208	39.7837	-100.446			2022		SRX18413457		SAMN31927208	USA		PRJNA288601	2022GN-00434	Rectal Swab	SRR22444531		SRR22444531		2022		Human					SRS15896424
121	65c6021a10bc37287d4b8228	SAMN32676082	60.472	8.4689			2020		SRX19002132	Norwegian Veterinary Institute	SAMN32676082	Norway		PRJNA922900	KGVET-2020-01-2661	Caecal	SRR23048635		SRR23048635		2020							SRS16422183
122	65c34c3a44ae8573122bad61	SAMN33566481	39.7837	-100.446			2022		SRX19548716		SAMN33566481	USA		PRJNA288601	2022GN-00500	Rectal Swab	SRR23686061		SRR23686061		2022		Human					SRS16933932
123	65c34c3a44ae851cf22bad60	SAMN33566482	39.7837	-100.446			2022		SRX19548717		SAMN33566482	USA		PRJNA288601	2022GN-00501	Rectal Swab	SRR23686060		SRR23686060		2022		Human					SRS16933933
124	65c5e53410bc3716974b72d5	SAMN33566487	39.7837	-100.446			2023		SRX19548704		SAMN33566487	USA		PRJNA288601	2023GN-00161	Rectal Swab	SRR23686073		SRR23686073		2023		Human					SRS16933920
125	65c6021a10bc376b2f4b82b2	SAMN33768336	39.7837	-100.446			2023		SRX19680106		SAMN33768336	USA		PRJNA288601	2023GN-00186	Rectal Swab	SRR23868017		SRR23868017		2023		Human					SRS17049538
126	65c6021a10bc37aa4c4b82f5	SAMN34157984	39.7837	-100.446			2023		SRX19946984		SAMN34157984	USA		PRJNA288601	2023GN-00226	Rectal Swab	SRR24148779		SRR24148779		2023		Human					SRS17295191
127	65c495f85f13bbac07f41458	SAMN34406638	39.7837	-100.446			2021		SRX20120716		SAMN34406638	USA		PRJNA288601	2022BM-00075	urine	SRR24326357		SRR24326357		2021		Human					SRS17449758
128	65c5e53510bc375ad44b741c	SAMN36884883	4.9239	-1.7446	1	4	2016		SRX21294057	Staff from ENRH	SAMN36884883	Ghana		PRJNA473419	C114	ENRH	SRR25565299		SRR25565299		2016-04-01		Human					SRS18543623
129	65c5e53510bc37763a4b7434	SAMN37516047	39.7837	-100.446			2023		SRX21861677		SAMN37516047	USA		PRJNA288601	2023GN-00513	Rectal Swab	SRR26149115		SRR26149115		2023		Human					SRS18956849
130	624cc19137ff7c99ce24da19	SRR10028274	47.5624	7.58322	1	1	2017		SRX6764580		SAMN12212263	Switzerland		PRJNA543274	705023-2-17	urine			SRR10028274		2017-01-01		Human		FALSE			SRS5312692
131	5f49d2d7f87f3943ba91f225	SRR10376956	40	-100			2016		SRX7078585	EIP	SAMN13166955	USA		PRJNA288601		Urine		DHQP1701627	SRR10376956		2016-01-01		Human		FALSE			SRS5594387
132	5f47be4c64435ffb4b7445d2	SRR10484695	50	-85	6	1	2011		SRX7174386	University of Manitoba	SAMN12731968	Canada	male	PRJNA564992		Blood		N16-03133	SRR10484695	Ontario	2011-01-06		Human		FALSE			SRS5680980
133	624cc19137ff7c360524db43	SRR10694562	40	-100	23	9	2015		SRX7371214		SAMN13523810	USA		PRJNA594602	mas30	mastitis milk			SRR10694562		2015-09-23		bovine		FALSE			SRS5829492
134	5f488c7e677a5572dd246986	SRR11841908	52.3167	5.55					SRX8392203	RIVM	SAMN15010592	Netherlands		PRJNA634885				RIVM_C018785	SRR11841908				Human		FALSE			SRS6705310
135	624cc19237ff7c861824df1d	SRR12508696	31.8954	-106.4	1	1	2016		SRX8999612	MDRO network	SAMN15868901	USA		PRJNA658369	ARLG-4640	urine			SRR12508696	Northeast	2016-01-01		Human		FALSE			SRS7252270
136	624cc19237ff7c6f0024de9c	SRR12508908	37.8611	-122.263	1	1	2017		SRX8999401	MDRO network	SAMN15868496	USA		PRJNA658369	ARLG-4230	respiratory			SRR12508908	South	2017-01-01		Human		FALSE			SRS7252059
137	624cc19237ff7cb7c824e1fa	SRR12653705	47.07	15.44	1	1	2018		SRX9134982	AGES	SAMN16182294	Austria		PRJNA663884	510017-18	feces			SRR12653705		2018-01-01		Human		FALSE			SRS7376932
138	624cc19237ff7c2d1c24e762	SRR13129362	40	-100	1	1	2018		SRX9570402		SAMN16895693	USA		PRJNA288601	2018HL-00203	urine bladder isolate			SRR13129362		2018-01-01		Human		FALSE			SRS7759803
139	624c68f537ff7c6e5524c109	SRR13893470	39.29	-76.59	1	1	2017		SRX10273132	Johns Hopkins Hospital	SAMN18207128	USA		PRJNA686978	KLPN_276	patient			SRR13893470	Baltimore	2017-01-01		Human		FALSE			SRS8406405
140	624c6ec237ff7c7fb324c747	SRR14402383	41.8756	-87.6244	1	1	2018		SRX10754748	Rush University Medical Center	SAMN18977005	USA		PRJNA686897	REALM_CRE_278	groin			SRR14402383	Chicago, IL	2018-01-01		Human		FALSE			SRS8836924
141	624c6ec237ff7c3bec24c731	SRR14402405	41.8756	-87.6244	1	1	2016		SRX10754726	Rush University Medical Center	SAMN18976961	USA		PRJNA686897	REALM_CRE_215	rectal			SRR14402405	Chicago, IL	2016-01-01		Human		FALSE			SRS8836902
142	624c6ec237ff7ccb6824c727	SRR14402416	41.8756	-87.6244	1	1	2016		SRX10754715	Rush University Medical Center	SAMN18976951	USA		PRJNA686897	REALM_CRE_201	rectal			SRR14402416	Chicago, IL	2016-01-01		Human		FALSE			SRS8836891
143	624c68f537ff7cc22524c2a8	SRR14402604	41.8756	-87.6244	1	1	2016		SRX10754527	Rush University Medical Center	SAMN18976991	USA		PRJNA686897	REALM_CRE_258	rectal			SRR14402604	Chicago, IL	2016-01-01		Human		FALSE			SRS8836703
144	624c68f537ff7c27d424c29c	SRR14402616	41.8756	-87.6244	1	1	2017		SRX10754515	Rush University Medical Center	SAMN18976891	USA		PRJNA686897	REALM_CRE_117	stool			SRR14402616	Chicago, IL	2017-01-01		Human		FALSE			SRS8836690
145	624c6ec237ff7cf7db24c813	SRR14402642	41.8756	-87.6244	1	1	2016		SRX10754976	Rush University Medical Center	SAMN18976914	USA		PRJNA686897	REALM_CRE_153	rectal			SRR14402642	Chicago, IL	2016-01-01		Human		FALSE			SRS8837152
146	624c6ec337ff7c6c2c24cbdd	SRR14449987	3.81667	-73.9167	1	1	2018		SRX10801105	MDRO network	SAMN19016488	Colombia		PRJNA658369	ARLG-7497	wound			SRR14449987		2018-01-01		Human		FALSE			SRS8887772
147	624c6ec337ff7c321624cbdc	SRR14449988	3.81667	-73.9167	1	1	2018		SRX10801104	MDRO network	SAMN19016487	Colombia		PRJNA658369	ARLG-7496	urine			SRR14449988		2018-01-01		Human		FALSE			SRS8887771
148	624c6ec337ff7c288524cbd6	SRR14449994	3.81667	-73.9167	1	1	2018		SRX10801098	MDRO network	SAMN19016483	Colombia		PRJNA658369	ARLG-7491	wound			SRR14449994		2018-01-01		Human		FALSE			SRS8887765
149	624c6ec337ff7cdfd624cbcb	SRR14450005	3.81667	-73.9167	1	1	2018		SRX10801087	MDRO network	SAMN19016473	Colombia		PRJNA658369	ARLG-7475	urine			SRR14450005		2018-01-01		Human		FALSE			SRS8887753
150	624c6ec337ff7c3ae424cbad	SRR14450035	3.81667	-73.9167	1	1	2017		SRX10801057	MDRO network	SAMN19016445	Colombia		PRJNA658369	ARLG-7440	wound			SRR14450035		2017-01-01		Human		FALSE			SRS8887724
151	5f4983e4677a55dc29247d43	SRR1561213	45.5	-73.5667			2009		SRX689567		SAMN02927723	Canada		PRJNA252957				Canada-2009c	SRR1561213	Quebec	2009-01-01		Human		FALSE			SRS692098
152	62ac978f289af200293af5c3	SRR16242764	36.4	117	14	8	2017		SRX12522631	Yingying Hao	SAMN22136695	China	female	PRJNA769451	JNKPN59	abdominal fluid			SRR16242764	Shandong province	2017-08-14		Human		FALSE			SRS10484388
153	62ac9797289af200293af719	SRR16610120	40	-100	18	1	2019		SRX12811252		SAMN22568351	USA		PRJNA288601	2019KU-00018	Bacterial isolate specimen			SRR16610120		2019-01-18		Human		FALSE			SRS10756701
154	62ac979f289af200293af85b	SRR17157384	40	-100	1	1	2021		SRX13341284		SAMN23741993	USA		PRJNA288601	2021GN-00322				SRR17157384		2021-01-01		Human		FALSE			SRS11246120
155	62ac97a9289af200293af9dd	SRR17302034	54	-2	28	11	2014		SRX13479258		SAMN24019278	United Kingdom		PRJNA788733	75717				SRR17302034		2014-11-28		Human		FALSE			SRS11375721
156	62ac97b7289af200293afbf3	SRR17302621	54	-2	15	7	2015		SRX13480007		SAMN24019139	United Kingdom		PRJNA788733	144642				SRR17302621		2015-07-15		Human		FALSE			SRS11376469
157	62ac97d7289af200293b00c9	SRR17308475	54	-2	11	12	2014		SRX13485844		SAMN24297269	United Kingdom		PRJNA788733	77259				SRR17308475		2014-12-11		Human		FALSE			SRS11381910
158	62ac97d9289af200293b0111	SRR17308548	54	-2	14	12	2015		SRX13485771		SAMN24297031	United Kingdom		PRJNA788733	222403				SRR17308548		2015-12-14		Human		FALSE			SRS11381837
159	62ac97de289af200293b01e3	SRR17308774	54	-2	17	6	2014		SRX13486173		SAMN24297479	United Kingdom		PRJNA788733	26628				SRR17308774		2014-06-17		Human		FALSE			SRS11382239
160	62ac97f3289af200293b04d3	SRR17883349	52.3167	5.55	1	1	2019		SRX14042512		SAMN25649346	Netherlands		PRJNA754858	RIVM_C019768	Rectum swab			SRR17883349		2019-01-01		Human		FALSE			SRS11877380
161	62ac9845289af200293b1163	SRR18217325	40.22	28.87	30	10	2018		SRX14363574	Uludag University Hospital	SAMN26422437	Turkey		PRJNA789336	TR-309	bloodstream			SRR18217325	Bursa	2018-10-30		Human		FALSE			SRS12176898
162	62ac984c289af200293b1277	SRR18508233	40	-100	1	1	2022		SRX14639468		SAMN27024970	USA		PRJNA288601	2022GN-00128				SRR18508233		2022-01-01		Human		FALSE			SRS12405564
163	62ac984c289af200293b1279	SRR18508236	40	-100	1	1	2022		SRX14639465		SAMN27024967	USA		PRJNA288601	2022GN-00127				SRR18508236		2022-01-01		Human		FALSE			SRS12405561
164	5f49e687677a551794248486	SRR4115194	42.2808	-83.743			2014		SRX2095137	University of Michigan	SAMN05723010	USA		PRJNA341404		Rectal swab		1875	SRR4115194		2014-01-01		Human		FALSE			SRS1664184
165	5f49c5f064435fdb16747c44	SRR5082329	-23.698	133.881			2009		SRX2400362	Lloyd Einsiedel	SAMN06112145	Australia		PRJNA351911		Blood		AS9_C4PNMANXX_CTCTCTAC-AGAGTAGA_L006	SRR5082329	Alice Springs	2009-01-01		Human		FALSE			SRS1840485
166	5f47e47d677a555bac245bc2	SRR5884866	54	-125		5	2014		SRX3050889	BC Centre for Disease Control	SAMN07312491	Canada		PRJNA231221		Peri-rectal		FDAARGOS_447	SRR5884866	BC	2014-05-01		Human		FALSE			SRS2397464
167	5f49f1a0f87f39448b91f48c	SRR5973388	29.7107	-95.4006	19	2	2017		SRX3130582	Houston Methodist Hospital	SAMN07525411	USA		PRJNA396774		Urine		NEK61	SRR5973388	Houston	2017-02-19		Human		FALSE			SRS3601535
168	62ac9930289af200293b31bf	SRR6702130	42.3605	-71.0596	1	1	2015		SRX3676309	Massachusetts General Hospital	SAMN04521907	USA		PRJNA271899	Klebsiella pneumoniae MGH158				SRR6702130	Massachusetts, Boston	2015-01-01		Human		FALSE			SRS2937381
169	5f4838af677a55c8632462d7	SRR7899088	47.66	-122.3	20	6	2004		SRX4736541	University of Washington	SAMN10103307	USA	female	PRJNA488268		Urine		TOP52-U19	SRR7899088		2004-06-20		Human		FALSE			SRS3818646
170	5f48531df87f39c50591cb4d	SRR7899089	47.66	-122.3	19	6	2004		SRX4736540	University of Washington	SAMN10103306	USA	female	PRJNA488268		Urine		TOP52-U18	SRR7899089		2004-06-19		Human		FALSE			SRS3818645
171	5f4838c7677a5514912462e7	SRR7899090	47.66	-122.3	2	6	2004		SRX4736539	University of Washington	SAMN10103309	USA	female	PRJNA488268		Vaginal		TOP52-V1	SRR7899090		2004-06-02		Human		FALSE			SRS3818644
172	5f4808d7f87f39c19d91c626	SRR7899091	47.66	-122.3	21	6	2004		SRX4736538	University of Washington	SAMN10103308	USA	female	PRJNA488268		Urine		TOP52-U20	SRR7899091		2004-06-21		Human		FALSE			SRS3818643
173	5f48457af87f390e8291ca6d	SRR7899092	47.66	-122.3	21	6	2004		SRX4736537	University of Washington	SAMN10103311	USA	female	PRJNA488268		Vaginal		TOP52-V20	SRR7899092		2004-06-21		Human		FALSE			SRS3818642
174	5f483b9964435f2dd5745223	SRR7899093	47.66	-122.3	12	6	2004		SRX4736536	University of Washington	SAMN10103310	USA	female	PRJNA488268		Vaginal		TOP52-V11	SRR7899093		2004-06-12		Human		FALSE			SRS3818641
175	5f480d8ff87f3968f791c68e	SRR7899094	47.66	-122.3	14	6	2004		SRX4736535	University of Washington	SAMN10103294	USA	female	PRJNA488268		Periurethral		TOP52-P13	SRR7899094		2004-06-14		Human		FALSE			SRS3818640
176	5f48449f677a5586e82463d5	SRR7899095	47.66	-122.3	18	6	2004		SRX4736534	University of Washington	SAMN10103295	USA	female	PRJNA488268		Periurethral		TOP52-P17	SRR7899095		2004-06-18		Human		FALSE			SRS3818639
177	5f483fa6f87f39428991c9f3	SRR7899096	47.66	-122.3	2	6	2004		SRX4736533	University of Washington	SAMN10103286	USA	female	PRJNA488268		Perianal		TOP52-A1	SRR7899096		2004-06-02		Human		FALSE			SRS3818638
178	5f4819db677a55232424604f	SRR7899097	47.66	-122.3	2	6	2004		SRX4736532	University of Washington	SAMN10103287	USA	female	PRJNA488268		Catheter urine		TOP52-C1	SRR7899097		2004-06-02		Human		FALSE			SRS3818637
179	5f4850bb677a555d72246485	SRR7899098	47.66	-122.3	2	6	2004		SRX4736531	University of Washington	SAMN10103288	USA	female	PRJNA488268		Fourchette		TOP52-F1	SRR7899098		2004-06-02		Human		FALSE			SRS3818636
180	5f48432df87f39567991ca27	SRR7899099	47.66	-122.3	3	6	2004		SRX4736530	University of Washington	SAMN10103289	USA	female	PRJNA488268		Periurethral		TOP52-P2	SRR7899099		2004-06-03		Human		FALSE			SRS3818648
181	5f4859a4677a55302e24654c	SRR7899100	47.66	-122.3	4	6	2004		SRX4736529	University of Washington	SAMN10103290	USA	female	PRJNA488268		Periurethral		TOP52-P3	SRR7899100		2004-06-04		Human		FALSE			SRS3818635
182	5f480c27f87f3960f291c66a	SRR7899101	47.66	-122.3	5	6	2004		SRX4736528	University of Washington	SAMN10103291	USA	female	PRJNA488268		Periurethral		TOP52-P4	SRR7899101		2004-06-05		Human		FALSE			SRS3818634
183	5f4822bd677a555102246129	SRR7899102	47.66	-122.3	12	6	2004		SRX4736527	University of Washington	SAMN10103292	USA	female	PRJNA488268		Periurethral		TOP52-P11	SRR7899102		2004-06-12		Human		FALSE			SRS3818633
184	5f4819e2f87f3952d091c768	SRR7899103	47.66	-122.3	13	6	2004		SRX4736526	University of Washington	SAMN10103293	USA	female	PRJNA488268		Periurethral		TOP52-P12	SRR7899103		2004-06-13		Human		FALSE			SRS3818647
185	5f48217064435fd89c745046	SRR7899104	47.66	-122.3	12	6	2004		SRX4736525	University of Washington	SAMN10103304	USA	female	PRJNA488268		Urine		TOP52-U11	SRR7899104		2004-06-12		Human		FALSE			SRS3818632
186	5f4828ccf87f399fd791c8a4	SRR7899105	47.66	-122.3	18	6	2004		SRX4736524	University of Washington	SAMN10103305	USA	female	PRJNA488268		Urine		TOP52-U17	SRR7899105		2004-06-18		Human		FALSE			SRS3818631
187	5f48221164435f228f74505f	SRR7899106	47.66	-122.3	2	6	2004		SRX4736523	University of Washington	SAMN10103300	USA	female	PRJNA488268		Rectal		TOP52-R1	SRR7899106		2004-06-02		Human		FALSE			SRS3818630
188	5f4817d864435f3447744fa2	SRR7899107	47.66	-122.3	12	6	2004		SRX4736522	University of Washington	SAMN10103301	USA	female	PRJNA488268		Rectal		TOP52-R11	SRR7899107		2004-06-12		Human		FALSE			SRS3818628
189	5f485164677a559fa72464a2	SRR7899108	47.66	-122.3	2	6	2004		SRX4736521	University of Washington	SAMN10103302	USA	female	PRJNA488268		Urine		TOP52-U1	SRR7899108		2004-06-02		Human		FALSE			SRS3818629
190	5f4812a164435fec51744f32	SRR7899109	47.66	-122.3	11	6	2004		SRX4736520	University of Washington	SAMN10103303	USA	female	PRJNA488268		Urine		TOP52-U10	SRR7899109		2004-06-11		Human		FALSE			SRS3818627
191	5f483fb164435ff35b74527d	SRR7899110	47.66	-122.3	19	6	2004		SRX4736519	University of Washington	SAMN10103296	USA	female	PRJNA488268		Periurethral		TOP52-P18	SRR7899110		2004-06-19		Human		FALSE			SRS3818624
192	5f4847d6f87f3912f291caa0	SRR7899111	47.66	-122.3	20	6	2004		SRX4736518	University of Washington	SAMN10103297	USA	female	PRJNA488268		Periurethral		TOP52-P19	SRR7899111		2004-06-20		Human		FALSE			SRS3818625
193	5f482044f87f39973191c7dc	SRR7899112	47.66	-122.3	21	6	2004		SRX4736517	University of Washington	SAMN10103298	USA	female	PRJNA488268		Periurethral		TOP52-P20	SRR7899112		2004-06-21		Human		FALSE			SRS3818626
194	5f4836c5677a5509232462ab	SRR7899113	47.66	-122.3	15	7	2004		SRX4736516	University of Washington	SAMN10103299	USA	female	PRJNA488268		Periurethral		TOP52-P44	SRR7899113		2004-07-15		Human		FALSE			SRS3818623
195	5f49c174f87f39c3c691f0db	SRR8651534	-25.3332	28.1329	14	5	2018		SRX5449261	MD Ekwanzala	SAMN10992597	South Africa		PRJNA524761		Influent of wastewater		IW2	SRR8651534	Pretoria	2018-05-14				FALSE			SRS4425855
196	5f48c9d6677a552465246dad	SRR8738426	39.3519	-76.6217	1	11	2011		SRX5531233		SAMN11125717	USA		PRJNA527021				AS000270	SRR8738426	Loyola University	2011-11-01		Human		FALSE			SRS4497497
